# Supplementary material
Source: publisher figshare collection journal article supplement (https://tandf.figshare.com/ndownloader/files/12775427)
Supplement: Supplementary file 1 [file 12775427]

APPENDIX

**Medication adherence Estimation and Differentiation Scale (MEDS)**

**Over the past SIX MONTHS**, how often have you done the following things **without** **being advised to do so by your doctor**? Please respond to all of the following statements by selecting **Never, Rarely, Sometimes, Often,** or **Always**.

|  | **Never** | **Rarely** | **Sometimes** | **Often** | **Always** |
| --- | --- | --- | --- | --- | --- |
| I forgot to take a dose of my medication. | ⭘ | ⭘ | ⭘ | ⭘ | ⭘ |
| I skipped a dose of my medication because I was worried about its side effects. | ⭘ | ⭘ | ⭘ | ⭘ | ⭘ |
| I skipped a dose of my medication because I was having side effects. | ⭘ | ⭘ | ⭘ | ⭘ | ⭘ |
| I skipped a dose of my medication because I was feeling better. | ⭘ | ⭘ | ⭘ | ⭘ | ⭘ |
| I skipped a dose of my medication because I was worried about getting addicted to it. | ⭘ | ⭘ | ⭘ | ⭘ | ⭘ |
| I skipped a dose of my medication because I did not need it. | ⭘ | ⭘ | ⭘ | ⭘ | ⭘ |
| I skipped a dose of my medication because I was worried about costs. | ⭘ | ⭘ | ⭘ | ⭘ | ⭘ |
| I took a smaller amount of my medication because I was worried about its side effects. | ⭘ | ⭘ | ⭘ | ⭘ | ⭘ |
| I took a smaller amount of my medication because I was having side effects. | ⭘ | ⭘ | ⭘ | ⭘ | ⭘ |
| I took a smaller amount of my medication because I was feeling better. | ⭘ | ⭘ | ⭘ | ⭘ | ⭘ |
| I took a smaller amount of my medication because I was worried about getting addicted to it. | ⭘ | ⭘ | ⭘ | ⭘ | ⭘ |
| I took a smaller amount of my medication because I did not need it. | ⭘ | ⭘ | ⭘ | ⭘ | ⭘ |
| I took a smaller amount of my medication because I was worried about costs. | ⭘ | ⭘ | ⭘ | ⭘ | ⭘ |
| I missed a dose of my medication by mistake. | ⭘ | ⭘ | ⭘ | ⭘ | ⭘ |
| I missed a dose of my medication because I did not get it refilled before I ran out. | ⭘ | ⭘ | ⭘ | ⭘ | ⭘ |
| I missed a dose of my medication because I forgot to take it with me. | ⭘ | ⭘ | ⭘ | ⭘ | ⭘ |
